# Supplementary material for: A deep sequencing tool for partitioning clearance rates following antimalarial treatment in polyclonal infections
Source: PubMed Central journal article supplement (PMC4753362; doi:10.1093/emph/eov036), 2016-01-27

## Supplementary Material

To quantify the noise in estimating haplotypes, we generated a sequencing dilution series of control mixtures. Figure S1 shows the frequency of false haplotypes (averaged across replicate runs) for mixtures with different parasite genomes per microliter of sample. We fitted a nonlinear curve to this data and used this curve to predict the frequency below which we expect to see false haplotypes at different input densities. The fitted curve is described by

$$\text{cutoff} = -0.02027 + \frac{0.13282}{\sqrt{\text{density}}}.$$

Table S1 shows the total parasite density, as determined by digital droplet PCR, and total read count for each patient at each time point. For each sample (patient and time point), we used a unique, parasite density-dependent frequency cutoff, requiring a parasite subpopulation (defined by its haplotype at the sequenced locus) to be at an average frequency of at least that cutoff value to be included in subsequent analyses. These cutoffs depended on the parasite density in the sample and are listed in Table S2. At a minimum, we required subpopulations to be at a frequency of 0.005.

The frequencies of all haplotypes for each patient, as determined by sequencing are given in Table S3. These frequencies show the relative abundance of a subpopulation at a given point in time after drug treatment. The sequencing was run in duplicate, so there are two estimates for each subpopulation at each time point. Patients from Tanzania have IDs beginning with T; patients from Cambodia have IDs beginning with C. Subpopulations are ranked by initial abundance.

In the main text, we analyze only data from infections with PCR-detectable parasites at 72 hours post-drug treatment. Here, we present the same analyses for patients from Tanzania with residual parasitemia up to 48 hours post-drug treatment (Figure S2), or with residual parasitemia up to 24 hours post-drug treatment (Figure S3). In total, 14 out of 19 patients from Tanzania demonstrate significant variation in clearance rates across subpopulations. We find the same results when we compare models using AIC instead of anova (Table S4).

As in Figure 8 of the main text, Figure S4 compares the clearance slopes of all subpopulations observed in Tanzanian patients with the slopes observed in Cambodian patients (where there was no variation). Many of the subpopulations in Tanzania are clearing at rates as slow as the Cambodian infections, where the C580Y mutation associated with artemisinin resistance was ubiquitous.

Across the majority of the Tanzanian infections, we find a strong negative correlation between the initial frequency of a subpopulation and its clearance rate (Figure S5), meaning that the slow-clearing subpopulations tend to be rare at the start of treatment.

### Figure Legends

**Fig. S1.** Frequencies of false haplotypes in sequencing dilution series of control mixtures. Also shown is the best-fit nonlinear curve that defined parasite density specific frequency cutoffs which were used to filter the sequencing results from our clinical samples.

**Fig. S2.** Estimating subpopulation clearance curves from infections in Tanzania, for patients with parasite detectable by PCR up to 48 hours post-drug treatment. (A) Relative abundance of parasite subpopulations within patients. For each patient (row) there are two bar graphs representing technical replicates, labeled 1 and 2. Within each patient, individual subpopulations have specific colors and are ranked by initial frequency. (The same color may thus represent different haplotypes in different patients.) (B) Densities of individual subpopulations (points) are calculated as the total density by PCR (crosses) multiplied by their relative abundance. Clearance curves are plotted for the total parasite density (dashed lines) and individual subpopulations (colored lines). Statistics reported represent model comparisons; p-values < 0.05 indicate that a more complicated model (one that includes

different slopes for each subpopulation within a patient) explains significantly more variation than a model with a single slope.

**Fig. S3.** Estimating subpopulation clearance curves from infections in Tanzania, for patients with parasite detectable by PCR up to 24 hours post-drug treatment. (A) Relative abundance of parasite subpopulations within patients. (B) Densities of individual subpopulations (points) are calculated as the total density by PCR (crosses) multiplied by their relative abundance. Clearance curves are plotted for the total parasite density (dashed lines) and individual subpopulations (colored lines).

**Fig. S4.** Comparison of clearance slopes of parasites isolated from all patients in Tanzania (patient IDs beginning with T) and Cambodia (patient IDs beginning with C). For patients from Tanzania, in which significant variation in clearance rates was observed, the clearance slopes of individual subpopulations are given in different colors. There was no significant variation in infections from Cambodia. The dashed lines (shaded region) represent the mean ( $\pm 1$  standard error of the mean) clearance slopes across patients from each region, as estimated by fitting linear models to the decline in  $\log_e$  total parasite density.

**Fig. S5.** Relationship between initial subpopulation frequency and clearance slope within patients. Pearson correlation coefficients are reported.

**Fig. S6.** Overall haplotype frequencies across patients at different time points. Haplotypes are categorized into those that were observed at 72 hours post-treatment (grey bars) and those that were not observed at 72 hours (white bars). Though parasite densities were lowest at 72 hours, and thus sequencing would be more error prone, the haplotypes we found in 72 hour samples occur at other time points as well and are, on average, as common as other haplotypes at those time points. The “population” sample represents the overall frequency of haplotypes across all patients and time points (all samples).

**Table S1. Total parasite density, reported as parasite genomes per microliter of extracted DNA, and total read count used for haplotype calling after applying filters, over time for each patient.**

| Patient     | Total parasite density |        |        |        | Total read count |        |        |        |
|-------------|------------------------|--------|--------|--------|------------------|--------|--------|--------|
|             | 0 hrs                  | 24 hrs | 48 hrs | 72 hrs | 0 hrs            | 24 hrs | 48 hrs | 72 hrs |
| <b>T01</b>  | 24150                  | 57.5   | 133    | 15.975 | 34171            | 9278   | 11212  | 1383   |
| <b>T04</b>  | 1025                   | 179.5  | 94.5   | 14.45  | 25511            | 3979   | 22991  | 1752   |
| <b>T05</b>  | 243.5                  | NA     | 46.5   | NA     | 23299            | NA     | 24179  | NA     |
| <b>T06</b>  | 600                    | NA     | 37.9   | NA     | 27040            | NA     | 11894  | NA     |
| <b>T07</b>  | 38000                  | NA     | 93.5   | NA     | 24720            | NA     | 17359  | NA     |
| <b>T15</b>  | 1500                   | NA     | 65     | NA     | 29455            | NA     | 12293  | NA     |
| <b>T16</b>  | 27600                  | 1375   | 133.5  | 50     | 32121            | 20798  | 28290  | 2734   |
| <b>T17</b>  | 6850                   | 214.5  | 257.5  | 31.25  | 45777            | 8694   | 14573  | 1229   |
| <b>T20</b>  | 16100                  | NA     | 41.85  | NA     | 36403            | NA     | 9432   | NA     |
| <b>T24</b>  | 316.5                  | NA     | 18.2   | NA     | 37878            | NA     | 10330  | NA     |
| <b>T36</b>  | 24900                  | 107    | 46.65  | 8.5    | 11577            | NA     | 10565  | NA     |
| <b>T39</b>  | 875                    | 232    | NA     | NA     | 46341            | 35164  | NA     | NA     |
| <b>T40</b>  | 29300                  | 488.5  | 250    | 12.5   | 20785            | 19526  | 13322  | 1637   |
| <b>T41</b>  | 1650                   | 49.3   | NA     | NA     | 10983            | 10176  | NA     | NA     |
| <b>T42</b>  | 14700                  | 107.5  | NA     | NA     | 35154            | 11712  | NA     | NA     |
| <b>T43</b>  | 6750                   | 234.5  | NA     | NA     | 18187            | 14553  | NA     | NA     |
| <b>T45</b>  | 21850                  | NA     | 45.05  | NA     | 24186            | NA     | 39477  | NA     |
| <b>T47</b>  | 185000                 | 127    | 27.35  | 28.75  | 18243            | 4379   | 14074  | 1259   |
| <b>T48</b>  | 21550                  | 86     | NA     | NA     | 31516            | 9955   | NA     | NA     |
| <b>T49</b>  | 2240                   | NA     | NA     | NA     | 25814            | NA     | 13446  | NA     |
| <b>C79</b>  | 161.5                  | 49.65  | 80.5   | 25.15  | 23974            | 15699  | 16726  | 7528   |
| <b>C84</b>  | 173.5                  | 67.5   | 59.5   | 10.95  | 4003             | 3078   | 1295   | 967    |
| <b>C90</b>  | 1445                   | 660    | 144    | 37.8   | 26456            | 34255  | 22296  | 13405  |
| <b>C91</b>  | 1780                   | 391.5  | 83     | 18.15  | 26214            | 33019  | 18990  | 6710   |
| <b>C107</b> | 635                    | 206.5  | 83.5   | 75     | 31756            | 38638  | 7382   | 7176   |
| <b>C110</b> | 214.5                  | 168.5  | 40     | 29.35  | 26162            | 28415  | 14450  | 6871   |
| <b>C114</b> | 1035                   | 68     | 35.55  | 28.65  | 38121            | 38281  | 8180   | 11495  |

**Table S2. Frequency cutoffs used for individual samples.**

| <b>Patient</b> | <b>Frequency cutoff</b> |               |               |               |
|----------------|-------------------------|---------------|---------------|---------------|
|                | <b>0 hrs</b>            | <b>24 hrs</b> | <b>48 hrs</b> | <b>72 hrs</b> |
| <b>T01</b>     | 0.005                   | 0.005         | 0.005         | 0.01296       |
| <b>T04</b>     | 0.005                   | 0.005         | 0.005         | 0.01467       |
| <b>T05</b>     | 0.005                   | 0.005         | 0.005         | 0.005         |
| <b>T06</b>     | 0.005                   | 0.005         | 0.005         | 0.005         |
| <b>T07</b>     | 0.005                   | 0.005         | 0.005         | 0.005         |
| <b>T15</b>     | 0.005                   | 0.005         | 0.005         | 0.005         |
| <b>T16</b>     | 0.005                   | 0.005         | 0.005         | 0.005         |
| <b>T17</b>     | 0.005                   | 0.005         | 0.005         | 0.005         |
| <b>T20</b>     | 0.005                   | 0.005         | 0.005         | 0.005         |
| <b>T24</b>     | 0.005                   | 0.01086       | 0.005         | 0.005         |
| <b>T36</b>     | 0.005                   | 0.005         | 0.005         | 0.02529       |
| <b>T39</b>     | 0.005                   | 0.005         | 0.005         | 0.005         |
| <b>T40</b>     | 0.005                   | 0.005         | 0.005         | 0.01730       |
| <b>T41</b>     | 0.005                   | 0.005         | 0.005         | 0.005         |
| <b>T42</b>     | 0.005                   | 0.005         | 0.005         | 0.005         |
| <b>T43</b>     | 0.005                   | 0.005         | 0.005         | 0.005         |
| <b>T45</b>     | 0.005                   | 0.005         | 0.005         | 0.005         |
| <b>T47</b>     | 0.005                   | 0.005         | 0.00513       | 0.005         |
| <b>T48</b>     | 0.005                   | 0.005         | 0.005         | 0.005         |
| <b>T49</b>     | 0.005                   | 0.005         | 0.005         | 0.005         |
| <b>C79</b>     | 0.005                   | 0.005         | 0.005         | 0.00622       |
| <b>C84</b>     | 0.005                   | 0.005         | 0.005         | 0.01987       |
| <b>C90</b>     | 0.005                   | 0.005         | 0.005         | 0.005         |
| <b>C91</b>     | 0.005                   | 0.005         | 0.005         | 0.01091       |
| <b>C107</b>    | 0.005                   | 0.005         | 0.005         | 0.005         |
| <b>C110</b>    | 0.005                   | 0.005         | 0.005         | 0.005         |
| <b>C114</b>    | 0.005                   | 0.005         | 0.005         | 0.005         |

**Table S3. Frequencies of haplotypes within patients over time.**

| Patient | Haplotype ID | Run 1<br>0 hrs | Run 1<br>24 hrs | Run 1<br>48 hrs | Run 1<br>72 hrs | Run 2<br>0 hrs | Run 2<br>24 hrs | Run 2<br>48 hrs | Run 2<br>72 hrs |
|---------|--------------|----------------|-----------------|-----------------|-----------------|----------------|-----------------|-----------------|-----------------|
| T01     | 1            | 0.8499         | 0.9195          | 0.1079          | 0.1823          | 0.8804         | 0.8840          | 0.2457          | 0.1898          |
| T01     | 2            | 0.0901         | 0.0565          | 0.0855          | 0.0296          | 0.0611         | 0.0719          | 0.0810          | 0.0110          |
| T01     | 3            | 0.0216         | NA              | 0.1549          | NA              | 0.0162         | NA              | 0.0985          | NA              |
| T01     | 4            | 0.0151         | NA              | 0.0211          | NA              | 0.0194         | NA              | 0.0167          | NA              |
| T01     | 5            | 0.0094         | NA              | 0.0961          | NA              | 0.0097         | NA              | 0.0624          | NA              |
| T01     | 6            | 0.0082         | 0.0226          | 0.2190          | 0.7241          | 0.0068         | 0.0178          | 0.2075          | 0.7059          |
| T01     | 7            | 0.0057         | NA              | 0.0084          | NA              | 0.0063         | NA              | 0.0068          | NA              |
| T01     | 8            | NA             | 0.0015          | NA              | 0.0443          | NA             | 0.0263          | NA              | 0.0025          |
| T01     | 9            | NA             | NA              | 0.1898          | 0.0197          | NA             | NA              | 0.1406          | 0.0907          |
| T01     | 10           | NA             | NA              | 0.0207          | NA              | NA             | NA              | 0.0578          | NA              |
| T01     | 11           | NA             | NA              | 0.0557          | NA              | NA             | NA              | 0.0266          | NA              |
| T01     | 12           | NA             | NA              | 0.0005          | NA              | NA             | NA              | 0.0316          | NA              |
| T01     | 13           | NA             | NA              | 0.0178          | NA              | NA             | NA              | 0.0240          | NA              |
| T01     | 14           | NA             | NA              | 0.0227          | NA              | NA             | NA              | 0.0007          | NA              |
| T04     | 1            | 0.8690         | 0.9833          | 0.0585          | 0.2505          | 0.8742         | 0.9835          | 0.0598          | 0.4094          |
| T04     | 2            | 0.0642         | NA              | 0.0413          | 0.1495          | 0.0666         | NA              | 0.0411          | 0.0555          |
| T04     | 3            | 0.0195         | NA              | 0.0234          | NA              | 0.0194         | NA              | 0.0250          | NA              |
| T04     | 4            | 0.0187         | NA              | 0.0231          | NA              | 0.0179         | NA              | 0.0278          | NA              |
| T04     | 5            | 0.0109         | NA              | 0.0138          | NA              | 0.0069         | NA              | 0.0150          | NA              |
| T04     | 6            | 0.0096         | 0.0167          | 0.0331          | 0.5736          | 0.0083         | 0.0165          | 0.0320          | 0.4618          |
| T04     | 7            | 0.0080         | NA              | NA              | NA              | 0.0068         | NA              | NA              | NA              |
| T04     | 8            | NA             | NA              | 0.7213          | NA              | NA             | NA              | 0.7027          | NA              |
| T04     | 9            | NA             | NA              | 0.0348          | NA              | NA             | NA              | 0.0369          | NA              |
| T04     | 10           | NA             | NA              | 0.0326          | NA              | NA             | NA              | 0.0293          | NA              |
| T04     | 11           | NA             | NA              | 0.0051          | NA              | NA             | NA              | 0.0124          | NA              |
| T04     | 12           | NA             | NA              | 0.0054          | 0.0088          | NA             | NA              | 0.0092          | 0.0362          |
| T04     | 13           | NA             | NA              | 0.0076          | NA              | NA             | NA              | 0.0090          | NA              |
| T04     | 14           | NA             | NA              | NA              | 0.0176          | NA             | NA              | NA              | 0.0370          |
| T05     | 1            | 0.7793         | NA              | 0.1636          | NA              | 0.7950         | NA              | 0.0798          | NA              |
| T05     | 2            | 0.0506         | NA              | 0.0591          | NA              | 0.0490         | NA              | 0.0113          | NA              |
| T05     | 3            | 0.0346         | NA              | 0.0287          | NA              | 0.0323         | NA              | 0.0361          | NA              |
| T05     | 4            | 0.0341         | NA              | 0.0312          | NA              | 0.0312         | NA              | 0.0248          | NA              |
| T05     | 5            | 0.0298         | NA              | 0.0174          | NA              | 0.0225         | NA              | 0.0063          | NA              |
| T05     | 6            | 0.0260         | NA              | 0.5679          | NA              | 0.0224         | NA              | 0.3935          | NA              |
| T05     | 7            | 0.0163         | NA              | 0.0161          | NA              | 0.0157         | NA              | 0.0060          | NA              |
| T05     | 8            | 0.0125         | NA              | 0.0610          | NA              | 0.0138         | NA              | 0.0150          | NA              |
| T05     | 9            | 0.0112         | NA              | 0.0181          | NA              | 0.0095         | NA              | 0.0080          | NA              |
| T05     | 10           | 0.0057         | NA              | 0.0326          | NA              | 0.0087         | NA              | 0.0075          | NA              |
| T05     | 11           | NA             | NA              | 0.0043          | NA              | NA             | NA              | 0.4118          | NA              |
| T06     | 1            | 0.7896         | NA              | 0.0797          | NA              | 0.7577         | NA              | 0.0752          | NA              |

|     |    |        |        |        |        |        |        |        |        |
|-----|----|--------|--------|--------|--------|--------|--------|--------|--------|
| T06 | 2  | 0.0531 | NA     | 0.0115 | NA     | 0.0549 | NA     | 0.0142 | NA     |
| T06 | 3  | 0.0257 | NA     | 0.0459 | NA     | 0.0462 | NA     | 0.0315 | NA     |
| T06 | 4  | 0.0295 | NA     | 0.5443 | NA     | 0.0310 | NA     | 0.6509 | NA     |
| T06 | 5  | 0.0237 | NA     | 0.1965 | NA     | 0.0306 | NA     | 0.0208 | NA     |
| T06 | 6  | 0.0265 | NA     | 0.0054 | NA     | 0.0228 | NA     | 0.0080 | NA     |
| T06 | 7  | 0.0186 | NA     | 0.0788 | NA     | 0.0208 | NA     | 0.0834 | NA     |
| T06 | 8  | 0.0155 | NA     | 0.0195 | NA     | 0.0142 | NA     | 0.0991 | NA     |
| T06 | 9  | 0.0071 | NA     | 0.0077 | NA     | 0.0118 | NA     | 0.0070 | NA     |
| T06 | 10 | 0.0108 | NA     | 0.0108 | NA     | 0.0101 | NA     | 0.0099 | NA     |
| T07 | 1  | 0.5574 | NA     | NA     | NA     | 0.5616 | NA     | NA     | NA     |
| T07 | 2  | 0.1905 | NA     | 0.2143 | NA     | 0.1943 | NA     | 0.4017 | NA     |
| T07 | 3  | 0.0635 | NA     | 0.0623 | NA     | 0.0593 | NA     | 0.0495 | NA     |
| T07 | 4  | 0.0582 | NA     | NA     | NA     | 0.0614 | NA     | NA     | NA     |
| T07 | 5  | 0.0432 | NA     | 0.3723 | NA     | 0.0430 | NA     | 0.0058 | NA     |
| T07 | 6  | 0.0406 | NA     | 0.0090 | NA     | 0.0371 | NA     | 0.0044 | NA     |
| T07 | 7  | 0.0260 | NA     | NA     | NA     | 0.0260 | NA     | NA     | NA     |
| T07 | 8  | 0.0206 | NA     | 0.3204 | NA     | 0.0173 | NA     | 0.1421 | NA     |
| T07 | 9  | NA     | NA     | 0.0046 | NA     | NA     | NA     | 0.2805 | NA     |
| T07 | 10 | NA     | NA     | 0.0008 | NA     | NA     | NA     | 0.1025 | NA     |
| T07 | 11 | NA     | NA     | 0.0163 | NA     | NA     | NA     | 0.0134 | NA     |
| T15 | 1  | 0.7944 | NA     | 0.1049 | NA     | 0.8021 | NA     | 0.1880 | NA     |
| T15 | 2  | 0.0568 | NA     | 0.0751 | NA     | 0.0534 | NA     | 0.0475 | NA     |
| T15 | 3  | 0.0522 | NA     | 0.0482 | NA     | 0.0535 | NA     | 0.0664 | NA     |
| T15 | 4  | 0.0282 | NA     | 0.0602 | NA     | 0.0282 | NA     | 0.0076 | NA     |
| T15 | 5  | 0.0204 | NA     | 0.0457 | NA     | 0.0141 | NA     | 0.0140 | NA     |
| T15 | 6  | 0.0141 | NA     | NA     | NA     | 0.0194 | NA     | NA     | NA     |
| T15 | 7  | 0.0150 | NA     | 0.1995 | NA     | 0.0127 | NA     | 0.2030 | NA     |
| T15 | 8  | 0.0105 | NA     | 0.0617 | NA     | 0.0089 | NA     | 0.0094 | NA     |
| T15 | 9  | 0.0084 | NA     | 0.0692 | NA     | 0.0078 | NA     | 0.0949 | NA     |
| T15 | 10 | NA     | NA     | 0.2722 | NA     | NA     | NA     | 0.2938 | NA     |
| T15 | 11 | NA     | NA     | 0.0250 | NA     | NA     | NA     | 0.0504 | NA     |
| T15 | 12 | NA     | NA     | 0.0250 | NA     | NA     | NA     | 0.0003 | NA     |
| T15 | 13 | NA     | NA     | 0.0133 | NA     | NA     | NA     | 0.0247 | NA     |
| T16 | 1  | 0.6990 | 0.7700 | 0.6756 | 0.1343 | 0.7309 | 0.7822 | 0.6902 | 0.1336 |
| T16 | 2  | 0.2527 | 0.2159 | 0.2348 | 0.0567 | 0.2177 | 0.2066 | 0.2587 | 0.0646 |
| T16 | 3  | 0.0227 | NA     | 0.0217 | NA     | 0.0247 | NA     | 0.0210 | NA     |
| T16 | 4  | 0.0105 | NA     | 0.0141 | NA     | 0.0145 | NA     | 0.0089 | NA     |
| T16 | 5  | 0.0081 | NA     | 0.0428 | 0.1563 | 0.0065 | NA     | 0.0088 | 0.0124 |
| T16 | 6  | 0.0070 | NA     | 0.0062 | 0.0294 | 0.0056 | NA     | 0.0063 | 0.0578 |
| T16 | 7  | NA     | 0.0141 | NA     | 0.6149 | NA     | 0.0112 | NA     | 0.6940 |
| T16 | 8  | NA     | NA     | 0.0049 | NA     | NA     | NA     | 0.0061 | NA     |
| T16 | 9  | NA     | NA     | NA     | 0.0031 | NA     | NA     | NA     | 0.0202 |
| T16 | 10 | NA     | NA     | NA     | 0.0052 | NA     | NA     | NA     | 0.0174 |

|     |    |        |        |        |        |        |        |        |        |
|-----|----|--------|--------|--------|--------|--------|--------|--------|--------|
| T17 | 1  | 0.6691 | 0.6311 | 0.1179 | 0.1359 | 0.2939 | 0.5707 | 0.2936 | 0.2932 |
| T17 | 2  | 0.0206 | NA     | 0.0579 | NA     | 0.2000 | NA     | 0.0921 | NA     |
| T17 | 3  | 0.1432 | NA     | 0.0369 | NA     | 0.0122 | NA     | 0.0059 | NA     |
| T17 | 4  | 0.0313 | 0.0126 | 0.4139 | 0.6641 | 0.1102 | 0.0124 | 0.0702 | 0.4267 |
| T17 | 5  | 0.0439 | NA     | 0.0582 | 0.1462 | 0.1061 | NA     | 0.2935 | 0.0787 |
| T17 | 6  | 0.0293 | NA     | 0.0408 | NA     | 0.0898 | NA     | 0.0004 | NA     |
| T17 | 7  | 0.0093 | NA     | 0.0435 | NA     | 0.0776 | NA     | 0.0347 | NA     |
| T17 | 8  | 0.0113 | NA     | 0.0150 | NA     | 0.0367 | NA     | 0.0136 | NA     |
| T17 | 9  | 0.0293 | NA     | 0.0324 | NA     | 0.0367 | NA     | 0.0254 | NA     |
| T17 | 10 | 0.0048 | NA     | 0.0052 | NA     | 0.0204 | NA     | 0.0070 | NA     |
| T17 | 11 | 0.0079 | NA     | 0.0109 | NA     | 0.0163 | NA     | 0.0081 | NA     |
| T17 | 12 | NA     | 0.3466 | 0.0506 | 0.0256 | NA     | 0.3971 | 0.0560 | 0.0405 |
| T17 | 13 | NA     | 0.0096 | NA     | NA     | NA     | 0.0197 | NA     | NA     |
| T17 | 14 | NA     | NA     | 0.0476 | 0.0077 | NA     | NA     | 0.0576 | 0.0310 |
| T17 | 15 | NA     | NA     | 0.0271 | NA     | NA     | NA     | 0.0408 | NA     |
| T17 | 16 | NA     | NA     | 0.0226 | NA     | NA     | NA     | 0.0006 | NA     |
| T17 | 17 | NA     | NA     | 0.0193 | NA     | NA     | NA     | 0.0006 | NA     |
| T17 | 18 | NA     | NA     | NA     | 0.0205 | NA     | NA     | NA     | 0.1299 |
| T20 | 1  | 0.6617 | NA     | 0.2766 | NA     | 0.6511 | NA     | 0.5107 | NA     |
| T20 | 2  | 0.2066 | NA     | NA     | NA     | 0.2022 | NA     | NA     | NA     |
| T20 | 3  | 0.0907 | NA     | 0.0121 | NA     | 0.0932 | NA     | 0.0102 | NA     |
| T20 | 4  | 0.0259 | NA     | 0.2059 | NA     | 0.0412 | NA     | 0.0476 | NA     |
| T20 | 5  | 0.0085 | NA     | 0.0141 | NA     | 0.0056 | NA     | 0.0173 | NA     |
| T20 | 6  | 0.0066 | NA     | 0.0091 | NA     | 0.0066 | NA     | 0.0080 | NA     |
| T20 | 7  | NA     | NA     | 0.1947 | NA     | NA     | NA     | 0.3731 | NA     |
| T20 | 8  | NA     | NA     | 0.1645 | NA     | NA     | NA     | 0.0011 | NA     |
| T20 | 9  | NA     | NA     | 0.0666 | NA     | NA     | NA     | 0.0094 | NA     |
| T20 | 10 | NA     | NA     | 0.0405 | NA     | NA     | NA     | 0.0039 | NA     |
| T20 | 11 | NA     | NA     | 0.0091 | NA     | NA     | NA     | 0.0107 | NA     |
| T20 | 12 | NA     | NA     | 0.0069 | NA     | NA     | NA     | 0.0080 | NA     |
| T24 | 1  | 0.0117 | NA     | 0.1111 | NA     | 0.3073 | NA     | 0.1203 | NA     |
| T24 | 2  | 0.2825 | NA     | NA     | NA     | 0.1188 | NA     | NA     | NA     |
| T24 | 3  | 0.2724 | NA     | NA     | NA     | 0.1154 | NA     | NA     | NA     |
| T24 | 4  | 0.0972 | NA     | NA     | NA     | 0.0840 | NA     | NA     | NA     |
| T24 | 5  | 0.0103 | NA     | 0.6440 | NA     | 0.0846 | NA     | 0.6518 | NA     |
| T24 | 6  | 0.0656 | NA     | 0.0489 | NA     | 0.0215 | NA     | 0.0398 | NA     |
| T24 | 7  | 0.0597 | NA     | NA     | NA     | 0.0322 | NA     | NA     | NA     |
| T24 | 8  | 0.0470 | NA     | NA     | NA     | 0.0577 | NA     | NA     | NA     |
| T24 | 9  | 0.0037 | NA     | NA     | NA     | 0.0393 | NA     | NA     | NA     |
| T24 | 10 | 0.0369 | NA     | NA     | NA     | 0.0308 | NA     | NA     | NA     |
| T24 | 11 | 0.0195 | NA     | NA     | NA     | 0.0347 | NA     | NA     | NA     |
| T24 | 12 | 0.0336 | NA     | 0.0145 | NA     | 0.0184 | NA     | 0.0156 | NA     |
| T24 | 13 | 0.0241 | NA     | NA     | NA     | 0.0106 | NA     | NA     | NA     |

|     |    |        |        |        |        |        |        |        |        |
|-----|----|--------|--------|--------|--------|--------|--------|--------|--------|
| T24 | 14 | 0.0234 | NA     | NA     | NA     | 0.0239 | NA     | NA     | NA     |
| T24 | 15 | 0.0076 | NA     | 0.0648 | NA     | 0.0130 | NA     | 0.0672 | NA     |
| T24 | 16 | 0.0047 | NA     | NA     | NA     | 0.0079 | NA     | NA     | NA     |
| T24 | 17 | NA     | NA     | 0.0554 | NA     | NA     | NA     | 0.0420 | NA     |
| T24 | 18 | NA     | NA     | 0.0345 | NA     | NA     | NA     | 0.0306 | NA     |
| T24 | 19 | NA     | NA     | 0.0269 | NA     | NA     | NA     | 0.0326 | NA     |
| T36 | 1  | 0.8773 | 0.9757 | 0.0553 | 0.2349 | 0.8610 | 0.9767 | 0.2470 | 0.2336 |
| T36 | 2  | 0.0543 | NA     | 0.1900 | NA     | 0.0613 | NA     | 0.0597 | NA     |
| T36 | 3  | 0.0208 | NA     | 0.0299 | NA     | 0.0249 | NA     | 0.0163 | NA     |
| T36 | 4  | 0.0132 | NA     | 0.5250 | NA     | 0.0203 | NA     | 0.0104 | NA     |
| T36 | 5  | 0.0110 | NA     | NA     | NA     | 0.0123 | NA     | NA     | NA     |
| T36 | 6  | 0.0089 | 0.0243 | 0.0675 | 0.7560 | 0.0082 | 0.0233 | 0.4055 | 0.6524 |
| T36 | 7  | 0.0079 | NA     | NA     | NA     | 0.0057 | NA     | NA     | NA     |
| T36 | 8  | 0.0068 | NA     | 0.0557 | NA     | 0.0062 | NA     | 0.0075 | NA     |
| T36 | 9  | NA     | NA     | 0.0285 | 0.0092 | NA     | NA     | 0.1243 | 0.1140 |
| T36 | 10 | NA     | NA     | 0.0338 | NA     | NA     | NA     | 0.0897 | NA     |
| T36 | 11 | NA     | NA     | 0.0028 | NA     | NA     | NA     | 0.0390 | NA     |
| T36 | 12 | NA     | NA     | 0.0114 | NA     | NA     | NA     | 0.0007 | NA     |
| T39 | 1  | 0.4969 | 0.8127 | NA     | NA     | 0.5262 | 0.8914 | NA     | NA     |
| T39 | 2  | 0.2989 | 0.1567 | NA     | NA     | 0.3011 | 0.0832 | NA     | NA     |
| T39 | 3  | 0.1377 | NA     | NA     | NA     | 0.1159 | NA     | NA     | NA     |
| T39 | 4  | 0.0195 | NA     | NA     | NA     | 0.0096 | NA     | NA     | NA     |
| T39 | 5  | 0.0164 | NA     | NA     | NA     | 0.0126 | NA     | NA     | NA     |
| T39 | 6  | 0.0057 | NA     | NA     | NA     | 0.0093 | NA     | NA     | NA     |
| T39 | 7  | 0.0055 | NA     | NA     | NA     | 0.0075 | NA     | NA     | NA     |
| T39 | 8  | 0.0074 | NA     | NA     | NA     | 0.0070 | NA     | NA     | NA     |
| T39 | 9  | 0.0071 | NA     | NA     | NA     | 0.0045 | NA     | NA     | NA     |
| T39 | 10 | 0.0050 | NA     | NA     | NA     | 0.0064 | NA     | NA     | NA     |
| T39 | 11 | NA     | 0.0306 | NA     | NA     | NA     | 0.0255 | NA     | NA     |
| T40 | 1  | 0.8954 | 0.9461 | 0.8609 | 0.2432 | 0.8845 | 0.9279 | 0.7846 | 0.3309 |
| T40 | 2  | 0.0320 | 0.0378 | 0.0078 | 0.0396 | 0.0358 | 0.0571 | 0.0810 | 0.0268 |
| T40 | 3  | 0.0276 | NA     | 0.0273 | NA     | 0.0214 | NA     | 0.0214 | NA     |
| T40 | 4  | 0.0155 | NA     | 0.0193 | NA     | 0.0192 | NA     | 0.0423 | NA     |
| T40 | 5  | 0.0094 | NA     | 0.0092 | NA     | 0.0166 | NA     | 0.0170 | NA     |
| T40 | 6  | 0.0131 | NA     | 0.0162 | 0.1550 | 0.0141 | NA     | 0.0315 | 0.0407 |
| T40 | 7  | 0.0071 | 0.0162 | 0.0594 | 0.5532 | 0.0085 | 0.0150 | 0.0222 | 0.5287 |
| T40 | 8  | NA     | NA     | NA     | 0.0090 | NA     | NA     | NA     | 0.0730 |
| T41 | 1  | 0.4695 | 0.7022 | NA     | NA     | 0.4922 | 0.6963 | NA     | NA     |
| T41 | 2  | 0.2714 | 0.0588 | NA     | NA     | 0.2497 | 0.1001 | NA     | NA     |
| T41 | 3  | 0.1554 | NA     | NA     | NA     | 0.1543 | NA     | NA     | NA     |
| T41 | 4  | 0.0356 | NA     | NA     | NA     | 0.0411 | NA     | NA     | NA     |
| T41 | 5  | 0.0179 | 0.0059 | NA     | NA     | 0.0191 | 0.0132 | NA     | NA     |
| T41 | 6  | 0.0185 | 0.0695 | NA     | NA     | 0.0133 | 0.0609 | NA     | NA     |



|     |    |        |        |        |        |        |        |        |        |
|-----|----|--------|--------|--------|--------|--------|--------|--------|--------|
| T41 | 7  | 0.0165 | 0.0055 | NA     | NA     | 0.0180 | 0.0070 | NA     | NA     |
| T41 | 8  | 0.0077 | NA     | NA     | NA     | 0.0065 | NA     | NA     | NA     |
| T41 | 9  | 0.0074 | 0.0449 | NA     | NA     | 0.0060 | 0.0376 | NA     | NA     |
| T41 | 10 | NA     | 0.0478 | NA     | NA     | NA     | 0.0434 | NA     | NA     |
| T41 | 11 | NA     | 0.0336 | NA     | NA     | NA     | 0.0159 | NA     | NA     |
| T41 | 12 | NA     | 0.0319 | NA     | NA     | NA     | 0.0256 | NA     | NA     |
| T42 | 1  | 0.5369 | 0.4637 | NA     | NA     | 0.6829 | 0.3889 | NA     | NA     |
| T42 | 2  | 0.4631 | 0.3511 | NA     | NA     | 0.3171 | 0.3731 | NA     | NA     |
| T42 | 3  | NA     | 0.0077 | NA     | NA     | NA     | 0.0513 | NA     | NA     |
| T42 | 4  | NA     | 0.0471 | NA     | NA     | NA     | 0.0367 | NA     | NA     |
| T42 | 5  | NA     | 0.0431 | NA     | NA     | NA     | 0.0231 | NA     | NA     |
| T42 | 6  | NA     | 0.0144 | NA     | NA     | NA     | 0.0338 | NA     | NA     |
| T42 | 7  | NA     | 0.0223 | NA     | NA     | NA     | 0.0094 | NA     | NA     |
| T42 | 8  | NA     | 0.0153 | NA     | NA     | NA     | 0.0220 | NA     | NA     |
| T42 | 9  | NA     | 0.0185 | NA     | NA     | NA     | 0.0134 | NA     | NA     |
| T42 | 10 | NA     | 0.0073 | NA     | NA     | NA     | 0.0184 | NA     | NA     |
| T42 | 11 | NA     | 0.0054 | NA     | NA     | NA     | 0.0160 | NA     | NA     |
| T42 | 12 | NA     | 0.0041 | NA     | NA     | NA     | 0.0138 | NA     | NA     |
| T43 | 1  | 0.7441 | 0.3327 | NA     | NA     | 0.7242 | 0.4404 | NA     | NA     |
| T43 | 2  | 0.1724 | 0.5396 | NA     | NA     | 0.1789 | 0.4530 | NA     | NA     |
| T43 | 3  | 0.0543 | 0.0723 | NA     | NA     | 0.0661 | 0.0643 | NA     | NA     |
| T43 | 4  | 0.0189 | 0.0323 | NA     | NA     | 0.0224 | 0.0150 | NA     | NA     |
| T43 | 5  | 0.0104 | 0.0136 | NA     | NA     | 0.0084 | 0.0140 | NA     | NA     |
| T43 | 6  | NA     | 0.0095 | NA     | NA     | NA     | 0.0134 | NA     | NA     |
| T45 | 1  | 0.5721 | NA     | 0.0483 | NA     | 0.5926 | NA     | 0.1353 | NA     |
| T45 | 2  | 0.2568 | NA     | NA     | NA     | 0.2856 | NA     | NA     | NA     |
| T45 | 3  | 0.0314 | NA     | 0.1274 | NA     | 0.0259 | NA     | 0.0662 | NA     |
| T45 | 4  | 0.0271 | NA     | 0.0312 | NA     | 0.0219 | NA     | 0.0270 | NA     |
| T45 | 5  | 0.0198 | NA     | 0.1557 | NA     | 0.0112 | NA     | 0.1725 | NA     |
| T45 | 6  | 0.0194 | NA     | 0.1884 | NA     | 0.0098 | NA     | 0.2152 | NA     |
| T45 | 7  | 0.0164 | NA     | 0.0645 | NA     | 0.0127 | NA     | 0.0038 | NA     |
| T45 | 8  | 0.0160 | NA     | 0.1462 | NA     | 0.0084 | NA     | 0.0617 | NA     |
| T45 | 9  | 0.0146 | NA     | NA     | NA     | 0.0100 | NA     | NA     | NA     |
| T45 | 10 | 0.0103 | NA     | 0.0955 | NA     | 0.0060 | NA     | 0.0662 | NA     |
| T45 | 11 | 0.0099 | NA     | 0.0132 | NA     | 0.0100 | NA     | 0.0150 | NA     |
| T45 | 12 | 0.0061 | NA     | 0.0325 | NA     | 0.0059 | NA     | 0.0072 | NA     |
| T45 | 13 | NA     | NA     | 0.0820 | NA     | NA     | NA     | 0.1639 | NA     |
| T45 | 14 | NA     | NA     | 0.0112 | NA     | NA     | NA     | 0.0403 | NA     |
| T45 | 15 | NA     | NA     | 0.0039 | NA     | NA     | NA     | 0.0255 | NA     |
| T47 | 1  | 0.6423 | 0.5232 | 0.0856 | 0.0961 | 0.6512 | 0.4962 | 0.4843 | 0.1740 |
| T47 | 2  | 0.1332 | 0.3133 | 0.0203 | 0.0366 | 0.1307 | 0.3119 | 0.0095 | 0.1131 |
| T47 | 3  | 0.0765 | 0.0946 | 0.0633 | 0.0183 | 0.0712 | 0.1181 | 0.0625 | 0.0365 |
| T47 | 4  | 0.0365 | NA     | 0.0248 | NA     | 0.0345 | NA     | 0.0263 | NA     |

|      |    |        |        |        |        |        |        |        |        |
|------|----|--------|--------|--------|--------|--------|--------|--------|--------|
| T47  | 5  | 0.0246 | NA     | 0.0128 | NA     | 0.0260 | NA     | 0.0505 | NA     |
| T47  | 6  | 0.0174 | 0.0261 | 0.0281 | NA     | 0.0195 | 0.0326 | 0.0037 | NA     |
| T47  | 7  | 0.0172 | NA     | 0.0150 | NA     | 0.0170 | NA     | 0.0158 | NA     |
| T47  | 8  | 0.0160 | NA     | 0.0099 | NA     | 0.0118 | NA     | 0.0089 | NA     |
| T47  | 9  | 0.0110 | NA     | 0.0701 | 0.1716 | 0.0117 | NA     | 0.0676 | 0.0097 |
| T47  | 10 | 0.0108 | 0.0429 | 0.1367 | 0.6522 | 0.0096 | 0.0411 | 0.1255 | 0.5255 |
| T47  | 11 | 0.0089 | NA     | 0.3962 | 0.0046 | 0.0105 | NA     | 0.1127 | 0.0487 |
| T47  | 12 | 0.0057 | NA     | NA     | NA     | 0.0062 | NA     | NA     | NA     |
| T47  | 13 | NA     | NA     | 0.0978 | NA     | NA     | NA     | 0.0058 | NA     |
| T47  | 14 | NA     | NA     | 0.0004 | NA     | NA     | NA     | 0.0251 | NA     |
| T47  | 15 | NA     | NA     | 0.0208 | 0.0206 | NA     | NA     | 0.0012 | 0.0925 |
| T47  | 16 | NA     | NA     | 0.0183 | NA     | NA     | NA     | 0.0007 | NA     |
| T48  | 1  | 0.6991 | 0.4735 | NA     | NA     | 0.6778 | 0.4913 | NA     | NA     |
| T48  | 2  | 0.2133 | 0.1544 | NA     | NA     | 0.2614 | 0.1922 | NA     | NA     |
| T48  | 3  | 0.0529 | 0.0477 | NA     | NA     | 0.0334 | 0.0402 | NA     | NA     |
| T48  | 4  | 0.0346 | 0.0305 | NA     | NA     | 0.0274 | 0.0294 | NA     | NA     |
| T48  | 5  | NA     | 0.0535 | NA     | NA     | NA     | 0.0786 | NA     | NA     |
| T48  | 6  | NA     | 0.0665 | NA     | NA     | NA     | 0.0335 | NA     | NA     |
| T48  | 7  | NA     | 0.0530 | NA     | NA     | NA     | 0.0107 | NA     | NA     |
| T48  | 8  | NA     | 0.0164 | NA     | NA     | NA     | 0.0382 | NA     | NA     |
| T48  | 9  | NA     | 0.0327 | NA     | NA     | NA     | 0.0316 | NA     | NA     |
| T48  | 10 | NA     | 0.0151 | NA     | NA     | NA     | 0.0257 | NA     | NA     |
| T48  | 11 | NA     | 0.0182 | NA     | NA     | NA     | 0.0209 | NA     | NA     |
| T48  | 12 | NA     | 0.0141 | NA     | NA     | NA     | 0.0004 | NA     | NA     |
| T48  | 13 | NA     | 0.0126 | NA     | NA     | NA     | 0.0068 | NA     | NA     |
| T48  | 14 | NA     | 0.0118 | NA     | NA     | NA     | 0.0004 | NA     | NA     |
| C79  | 1  | 1.0000 | 0.9930 | 1.0000 | 0.9018 | 1.0000 | 0.9920 | 1.0000 | 0.9481 |
| C79  | 2  | NA     | 0.0070 | NA     | 0.0460 | NA     | 0.0080 | NA     | 0.0270 |
| C79  | 3  | NA     | NA     | NA     | 0.0384 | NA     | NA     | NA     | 0.0013 |
| C79  | 4  | NA     | NA     | NA     | 0.0131 | NA     | NA     | NA     | 0.0117 |
| C79  | 5  | NA     | NA     | NA     | 0.0008 | NA     | NA     | NA     | 0.0119 |
| C84  | 1  | 1.0000 | 1.0000 | 1.0000 | 0.9405 | 1.0000 | 1.0000 | 1.0000 | 0.8814 |
| C84  | 2  | NA     | NA     | NA     | 0.0238 | NA     | NA     | NA     | 0.0475 |
| C84  | 3  | NA     | NA     | NA     | 0.0149 | NA     | NA     | NA     | 0.0373 |
| C84  | 4  | NA     | NA     | NA     | 0.0208 | NA     | NA     | NA     | 0.0339 |
| C90  | 1  | 1.0000 | 1.0000 | 1.0000 | 0.9853 | 1.0000 | 1.0000 | 1.0000 | 0.9713 |
| C90  | 2  | NA     | NA     | NA     | 0.0013 | NA     | NA     | NA     | 0.0184 |
| C90  | 3  | NA     | NA     | NA     | 0.0134 | NA     | NA     | NA     | 0.0103 |
| C91  | 1  | 1.0000 | 1.0000 | 1.0000 | 0.9824 | 1.0000 | 1.0000 | 1.0000 | 0.9899 |
| C91  | 2  | NA     | NA     | NA     | 0.0176 | NA     | NA     | NA     | 0.0101 |
| C107 | 1  | 1.0000 | 1.0000 | 1.0000 | 0.8942 | 1.0000 | 1.0000 | 1.0000 | 0.9335 |
| C107 | 2  | NA     | NA     | NA     | 0.1058 | NA     | NA     | NA     | 0.0665 |
| C110 | 1  | 1.0000 | 1.0000 | 1.0000 | 0.9176 | 1.0000 | 1.0000 | 1.0000 | 0.7746 |

|      |   |        |        |        |        |        |        |        |        |
|------|---|--------|--------|--------|--------|--------|--------|--------|--------|
| C110 | 2 | NA     | NA     | NA     | 0.0039 | NA     | NA     | NA     | 0.1644 |
| C110 | 3 | NA     | NA     | NA     | 0.0532 | NA     | NA     | NA     | 0.0303 |
| C110 | 4 | NA     | NA     | NA     | 0.0254 | NA     | NA     | NA     | 0.0308 |
| C114 | 1 | 0.9929 | 0.9914 | 1.0000 | 0.8307 | 0.9917 | 0.9904 | 1.0000 | 0.7125 |
| C114 | 2 | 0.0071 | 0.0086 | NA     | 0.0303 | 0.0083 | 0.0096 | NA     | 0.2090 |
| C114 | 3 | NA     | NA     | NA     | 0.0759 | NA     | NA     | NA     | 0.0641 |
| C114 | 4 | NA     | NA     | NA     | 0.0435 | NA     | NA     | NA     | 0.0102 |
| C114 | 5 | NA     | NA     | NA     | 0.0195 | NA     | NA     | NA     | 0.0041 |

**Table S4. Comparison of model selection approaches.** AIC scores for fitting a model with different slopes and intercepts for different parasite subpopulations to data from individual patients (Model 1), and for a simpler model that includes different intercepts but a single slope (Model 2).

| Last detected parasites by PCR | Patient ID | AIC Model 1 | AIC Model 2 | Model selection by AIC* | Model selection by anova† |
|--------------------------------|------------|-------------|-------------|-------------------------|---------------------------|
| 72 hours post-treatment        | T01        | 131.2       | 164.6       | 1                       | 1                         |
|                                | T04        | 66.2        | 101.6       | 1                       | 1                         |
|                                | T16        | 96.7        | 106.9       | 1                       | 1                         |
|                                | T17        | 198         | 194.3       | 2                       | 2                         |
|                                | T36        | 120.8       | 129.3       | 1                       | 1                         |
|                                | T40        | 114.1       | 130.5       | 1                       | 1                         |
|                                | T47        | 225.8       | 249.5       | 1                       | 1                         |
| 48 hours post-treatment        | T05        | 55.5        | 110.9       | 1                       | 1                         |
|                                | T06        | 67.2        | 120.7       | 1                       | 1                         |
|                                | T07        | 63.8        | 69.3        | 2                       | 2                         |
|                                | T15        | 65.9        | 94.5        | 1                       | 1                         |
|                                | T20        | 26.9        | 52.9        | 1                       | 1                         |
|                                | T24        | 61.7        | 67.2        | 2                       | 2                         |
|                                | T45        | 86.9        | 119.9       | 1                       | 1                         |
| 24 hours post-treatment        | T39        | 3.5         | 16.1        | 1                       | 1                         |
|                                | T41        | 5.7         | 60.8        | 1                       | 1                         |
|                                | T42        | -1.0        | -0.5        | 2                       | 2                         |
|                                | T43        | 1.1         | 23.6        | 1                       | 1                         |
|                                | T48        | -7.2        | -5.5        | 2                       | 2                         |

\* The model with the lowest AIC value provides a better fit. We use the criteria that a more complex model is selected only if it has an Akaike weight greater than 0.95 (interpreted as a 95% chance that Model 1 is the best model for the data<sup>1</sup>), which occurs when  $AIC_{Model2} - AIC_{Model1} > 5.9$ .

† This method compares the residual deviation left in the two models. Selecting the more complicated model (Model 1) is only justified when significantly more variation is explained. Results are as reported in the text and figures.

<sup>1</sup> Johnson JB, Omland KS. Model selection in ecology and evolution. *Trends Ecol Evol* 2004;**19**:101-108.

Figure S1

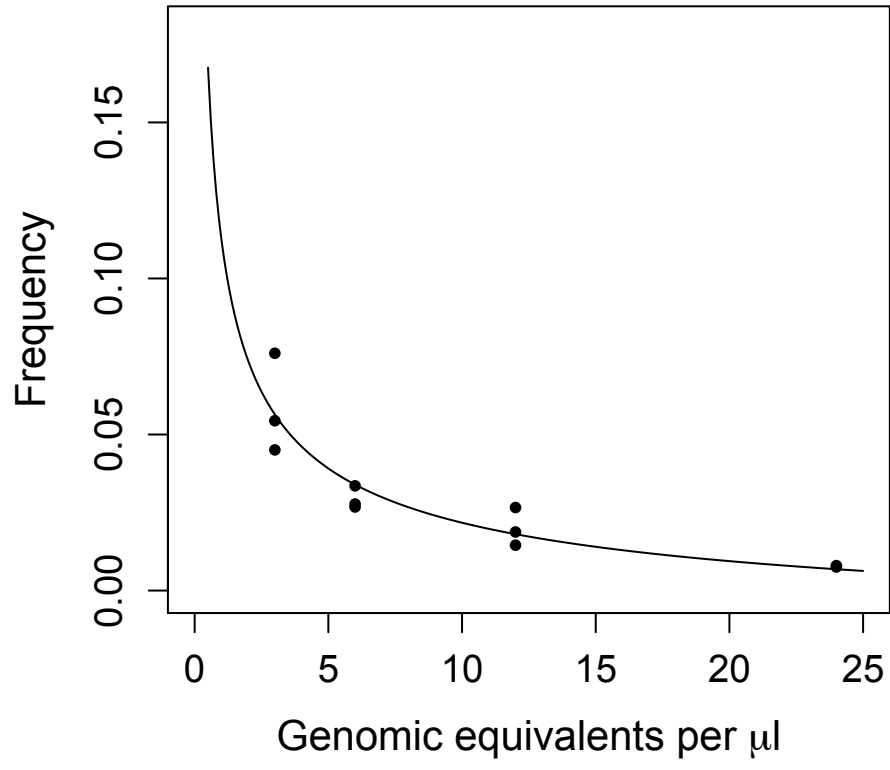

**Figure S2**

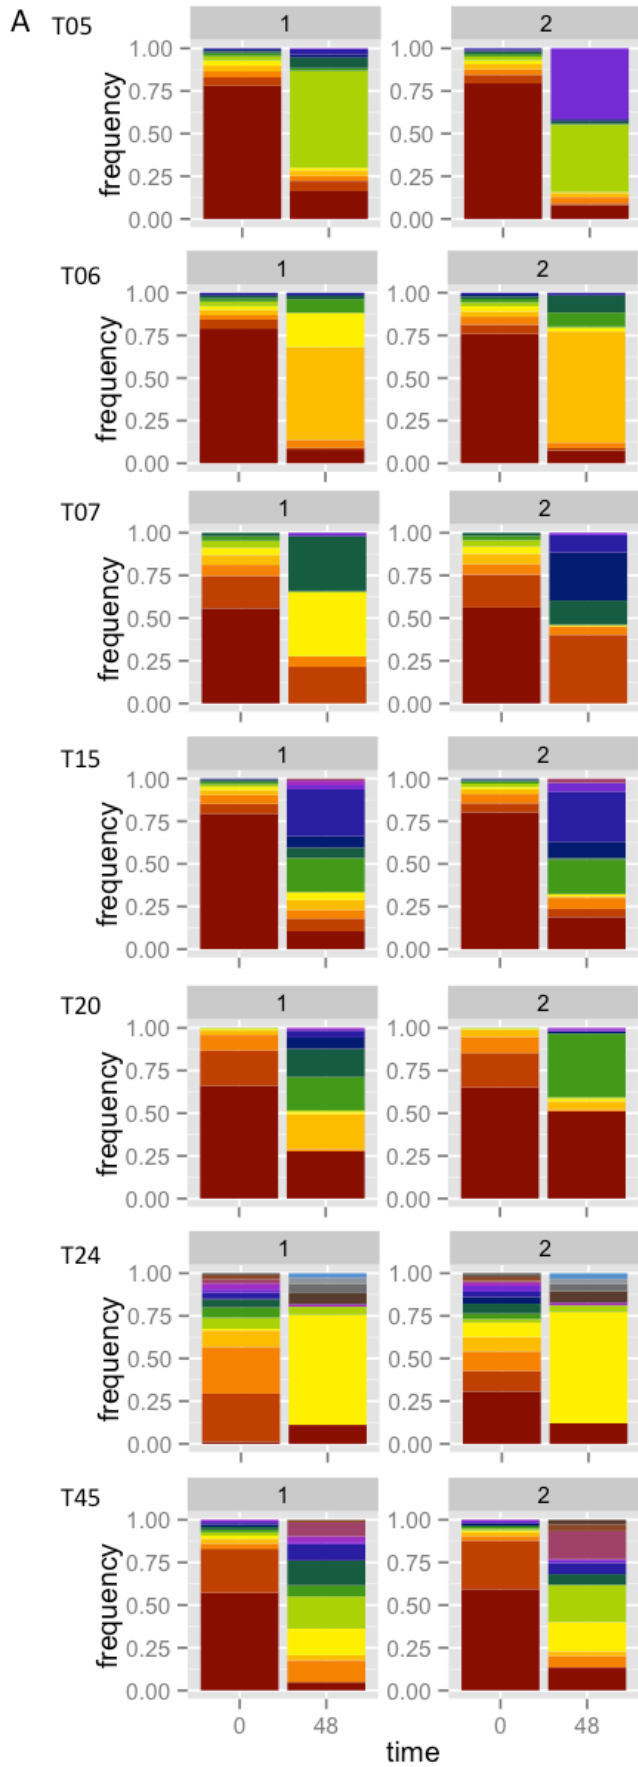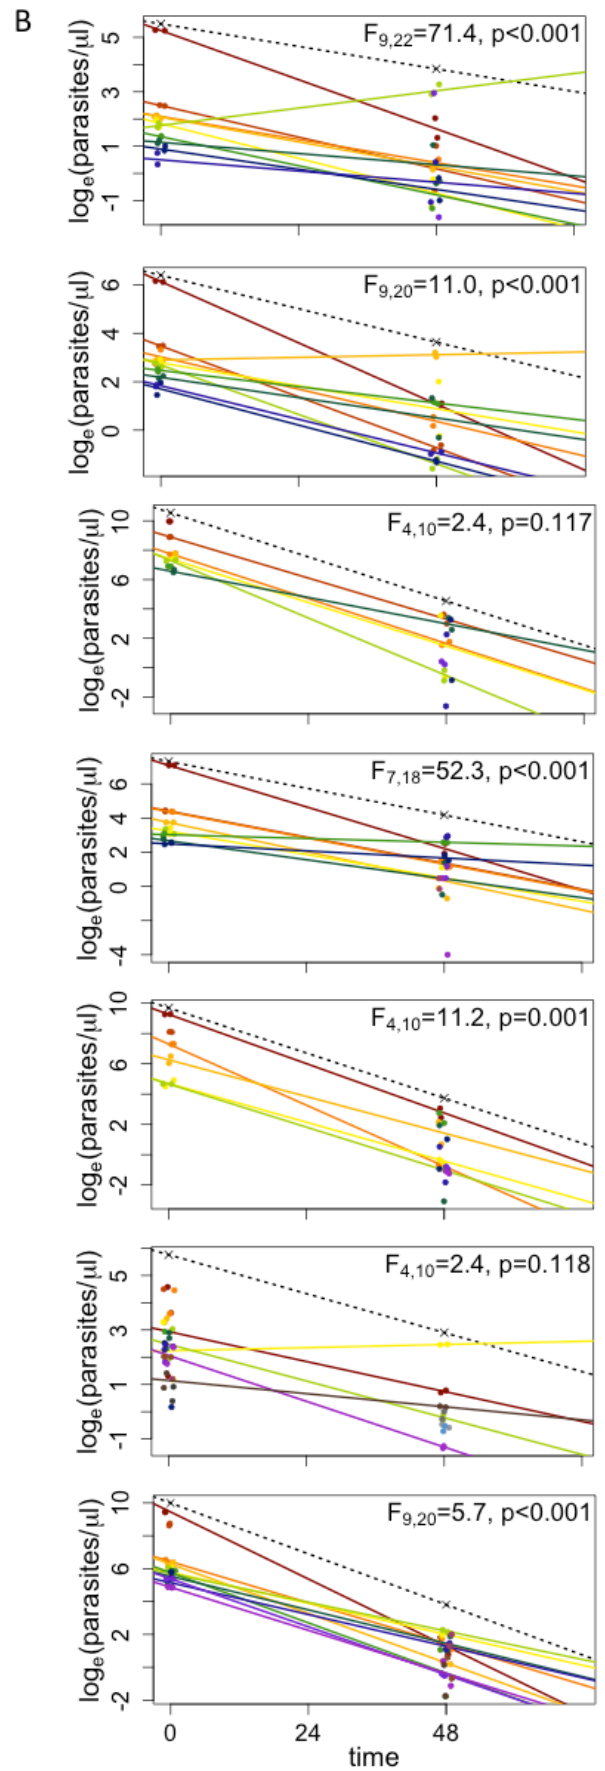

**Figure S3**

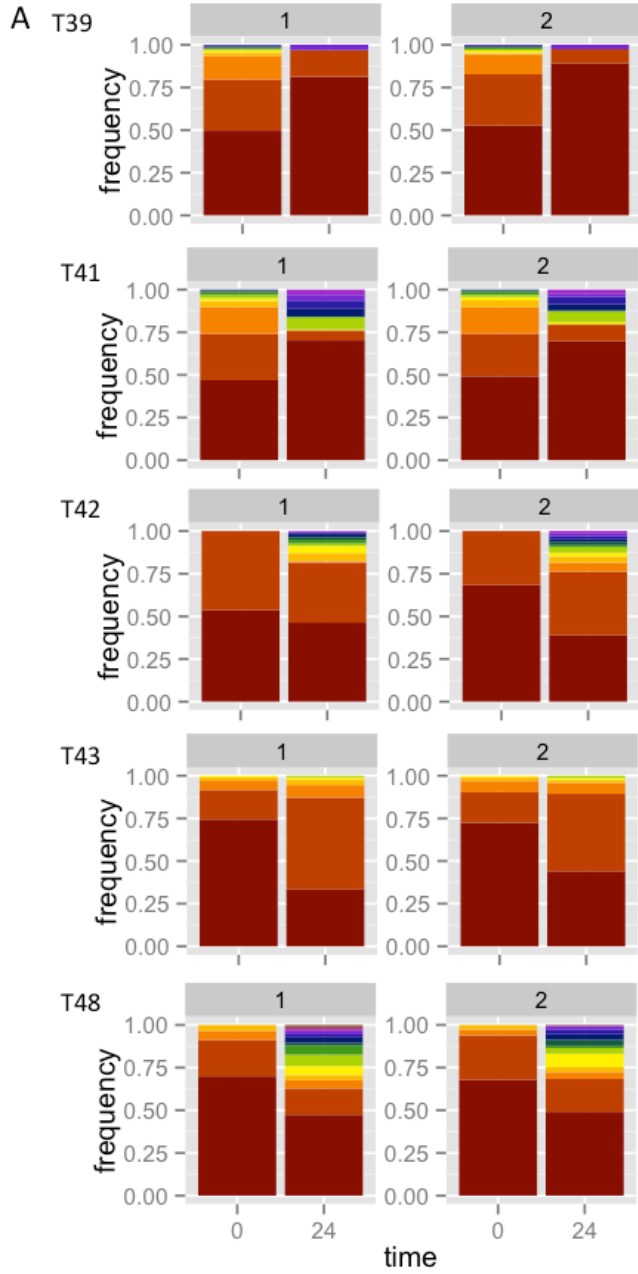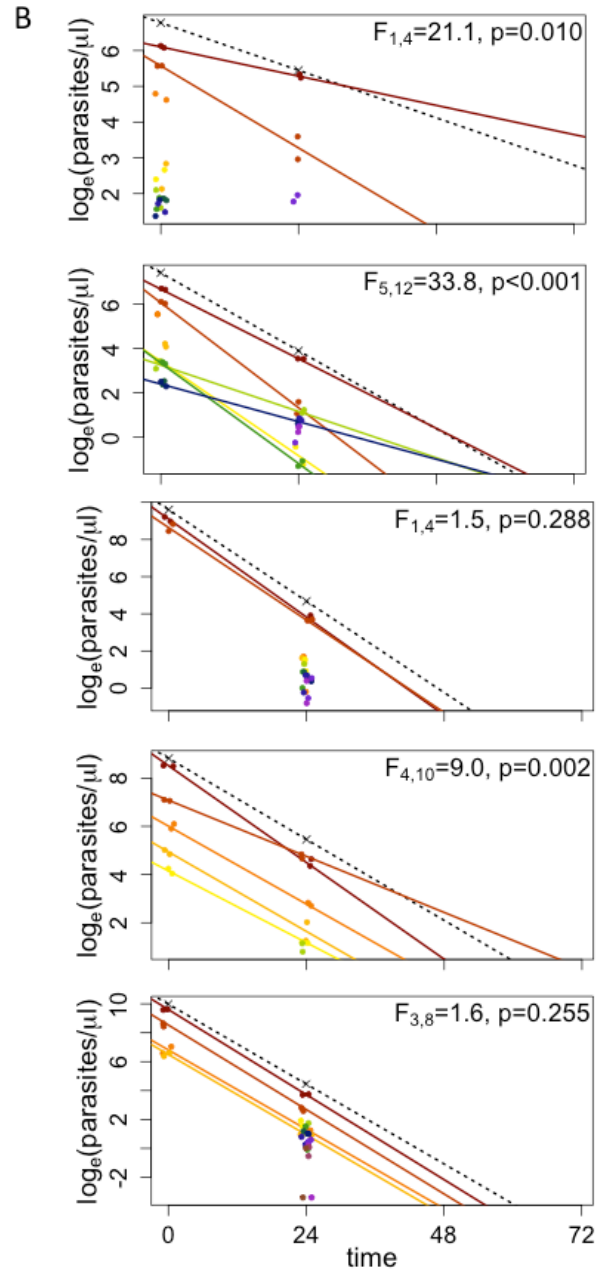

Figure S4

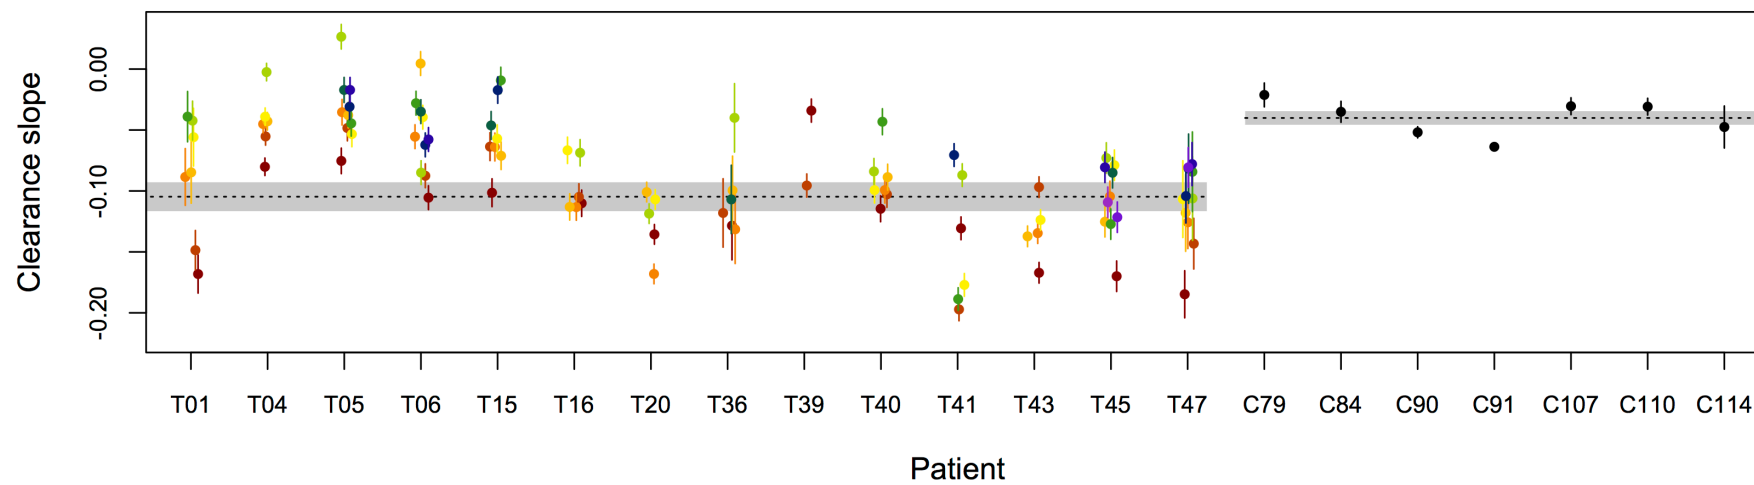



Figure S5

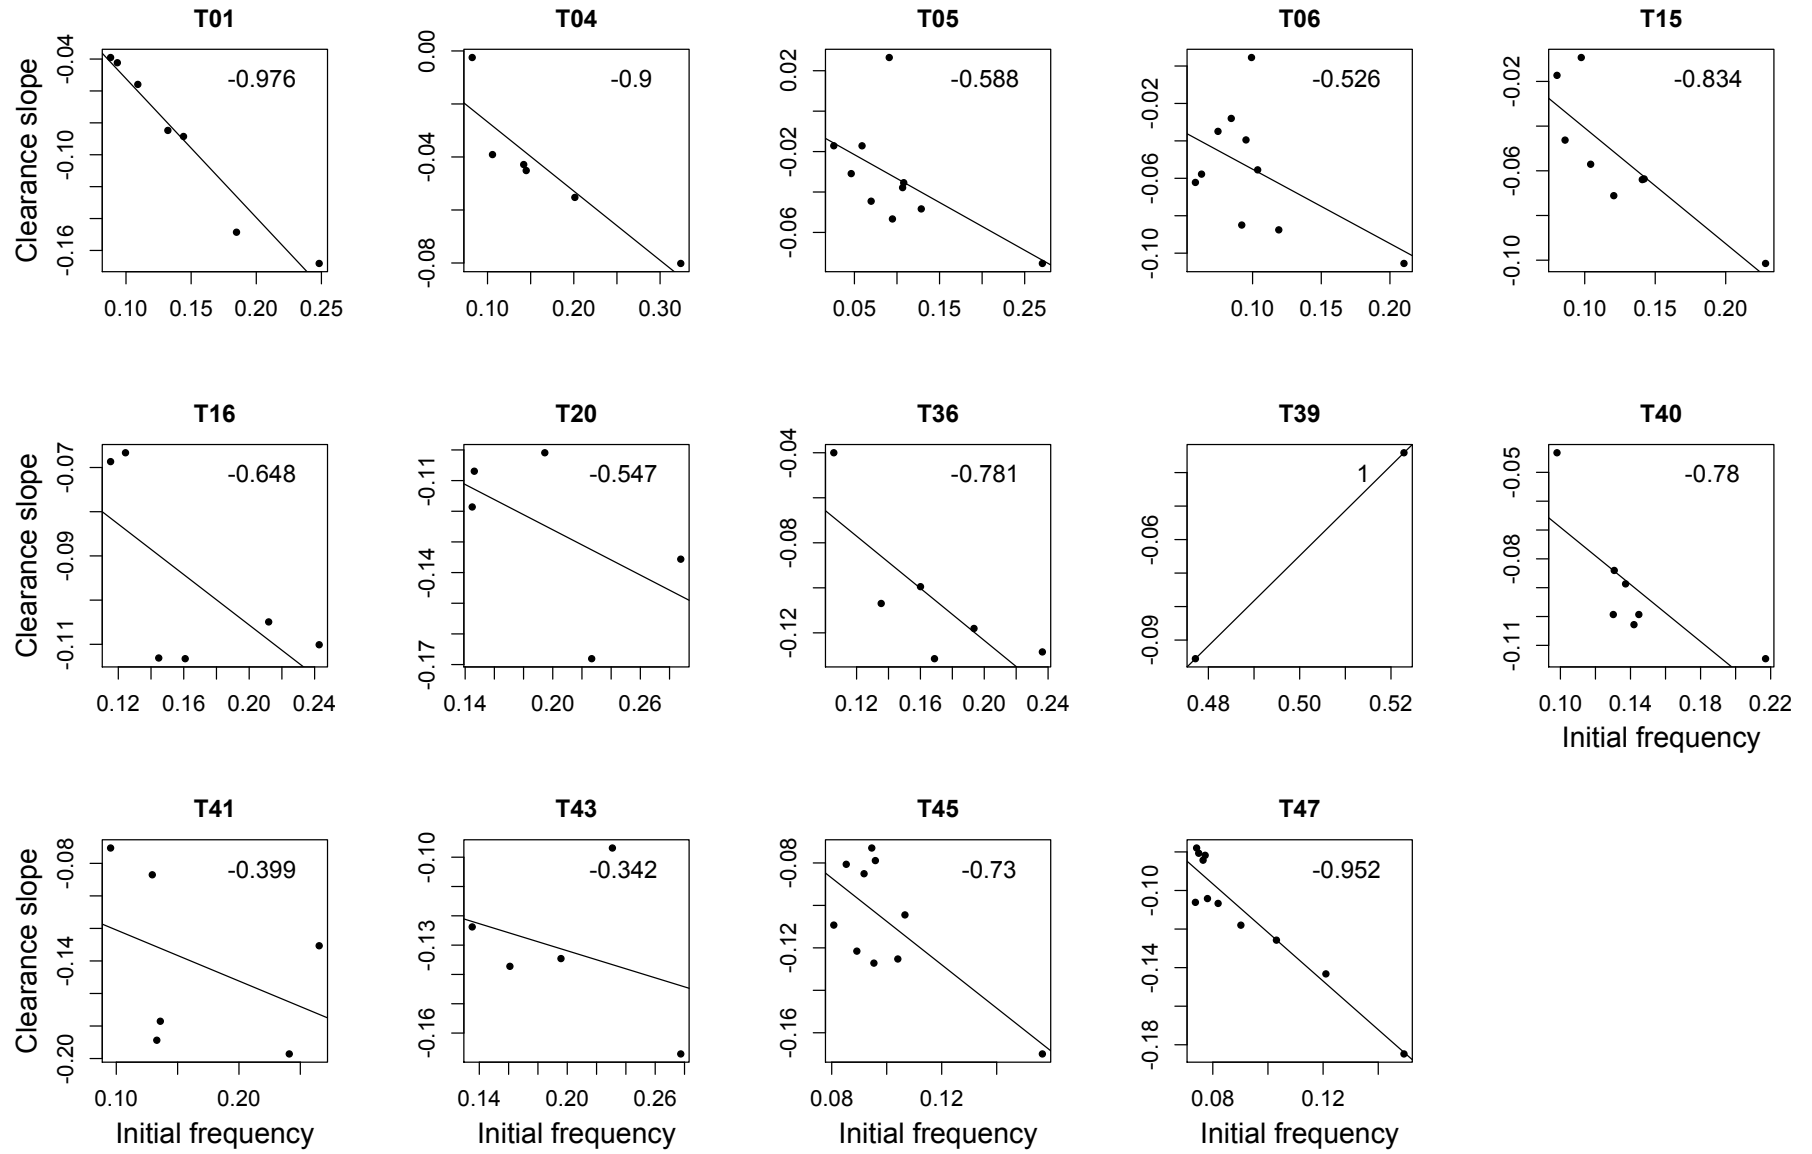

Figure S6

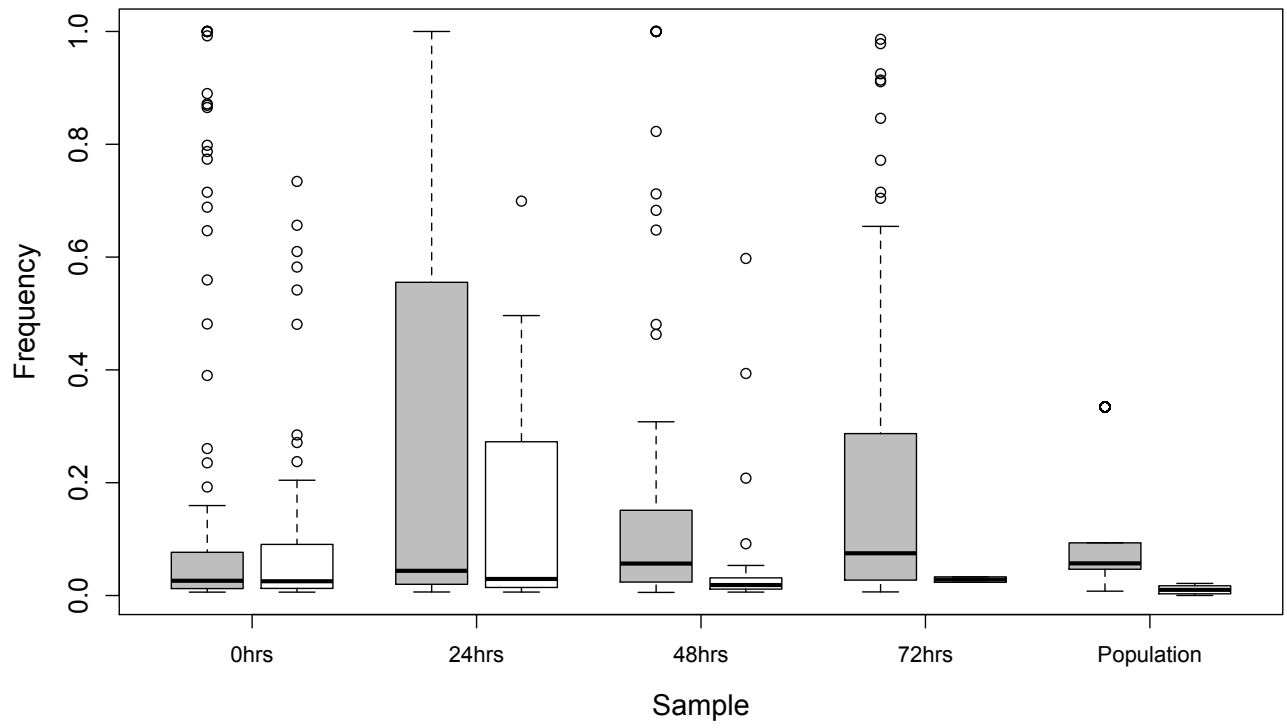

Supplement: supp_eov036_RevisedSupplementaryMaterial.pdf [file supp_eov036_RevisedSupplementaryMaterial.pdf]
